# Supplementary material
Source: publisher site journal article supplement (https://www.dovepress.com/article/237948)
Supplement: Supplementary file 1 [file get_supplementary_file.php]

**Supplemental Materials**

**Appendix Table 1. Reported Challenges during the First Week of Insulin Use**

|  | **Continuers** | | **Interrupters** | | **Discontinuers** | | **P-value** | | |
| --- | --- | --- | --- | --- | --- | --- | --- | --- | --- |
|  | **(n = 52)** | | **(n = 52)** | | **(n = 50)** | |
|  | **[A]** | | **[B]** | | **[C]** | | **[A vs. B]** | **[A vs. C]** | **[B vs. C]** |
| **Challenges during first week of insulin use** |  |  |  |  |  |  |  |  |  |
| Difficult/very difficult, n (%) |  |  |  |  |  |  |  |  |  |
| Injecting insulin | 2 | (3.8%) | 15 | (28.8%) | 10 | (20.0%) | <0.01 | 0.01 | 0.30 |
| More frequent blood glucose monitoring | 1 | (1.9%) | 21 | (40.4%) | 8 | (16.0%) | <0.01 | 0.01 | <0.01 |
| Titration | 1 | (1.9%) | 15 | (28.8%) | 12 | (24.0%) | <0.01 | <0.01 | 0.58 |
| Proper insulin storage | 0 | (0.0%) | 16 | (30.8%) | 4 | (8.0%) | <0.01 | 0.04 | <0.01 |
| Remembering to inject insulin regularly | 1 | (1.9%) | 25 | (48.1%) | 13 | (26.0%) | <0.01 | <0.01 | 0.02 |
| Making time during the day to inject insulin | 1 | (1.9%) | 20 | (38.5%) | 11 | (22.0%) | <0.01 | <0.01 | 0.07 |
| Feeling confident about treating hypoglycemia | 4 | (7.7%) | 13 | (25.0%) | 10 | (20.0%) | 0.02 | 0.07 | 0.55 |
| Dealing with emotions about needing insulin | 6 | (11.5%) | 19 | (36.5%) | 13 | (26.0%) | <0.01 | 0.06 | 0.25 |
| Worry about reaction to insulin use from friends/family | 3 | (5.8%) | 18 | (34.6%) | 7 | (14.0%) | <0.01 | 0.16 | 0.02 |

Statistically signiﬁcant at p <0.05; p-values estimated relative to continuers cohort using chi-square tests.

Continuers had no gaps of ≥7 days in basal insulin treatment. Interrupters stopped basal insulin for ≥7 days within the first 6 months after initiation and since restarted basal insulin. Discontinuers stopped using basal insulin for ≥7 days within the first 6 months after initiation and had not restarted basal insulin by the time of the survey. Challenges during the first week of insulin use were assessed on a 4 point scale (1="Not at all difficult", 2="Somewhat difficult", 3="Difficult", 4="Very difficult").
